# Supplementary material for: TET1 Suppresses Hepatocellular Carcinoma Progression by Modulating the PI3K/Akt Signaling Pathways
Source: Research Square preprint supplement (doi:10.21203/rs.3.rs-8307416/v1), 2025-12-30
Supplement: Supplementary file 1 [file 6bc25131f1594e097c4a1978.pdf]

Ref: 254411

Permission is granted to Scientific Reports of Springer Nature Ltd to publish both in print and digital under the CC BY 4.0 open access license the result of using KEGG and the following KEGG images in the article "TET1 Suppresses Hepatocellular Carcinoma Progression by Modulating the PI3K/Akt Signaling Pathways" written by Shuaiyong Qi, Ming Chen, Zhixian Ding, Mike Dai, Lusheng Wang, Jie Chen, Yu Tang, Mengxue Hu, Yafei Li, Kemeng Tan, Lili Li, Hui Jiang, Heng Tang and colleagues:

- PI3K-Akt signaling pathway (map04151)
- Human papillomavirus infection (map05165)
- Shigellosis (map05131)
- Human cytomegalovirus infection (map05163)
- Focal adhesion (map04510)
- Proteoglycans in cancer (map05205)
- Cellular senescence (map04218)
- mTOR signaling pathway (map04150)
- Insulin signaling pathway (map04910)
- AGE-RAGE signaling pathway in diabetic complications (map04933)
- Insulin resistance (map04931)
- Colorectal cancer (map05210)
- EGFR tyrosine kinase inhibitor resistance (map01521)
- Pancreatic cancer (map05212)
- Hepatocellular carcinoma (map05225)

subject to the condition that the original source is acknowledged by citing at least one KEGG paper.

Permission granted:

*Yixuan Song*

Yixuan Song, Kanehisa Laboratories

Date: 10 December 2025

Copyright holder: Kanehisa Laboratories
