# Supplementary material for: TET1 Suppresses Hepatocellular Carcinoma Progression by Modulating the PI3K/Akt Signaling Pathways
Source: Research Square preprint supplement (doi:10.21203/rs.3.rs-8307416/v1), 2025-12-30
Supplement: Supplementary file 1 [file HepG2 vs L02 Vacno.xlsx]

## Sheet: Sheet1
Gene name	log2FoldChange	pValue
GSS	1.73943	5.21e-07
FAM98C	3.57357	0.000670196
ARHGAP26	2.42762	1.51e-28
CAMSAP3	2.4975	5.49e-21
TP63	5.71832	0.00640364
	-1.03301	0.022024
RPS6KL1	-4.49743	0.0188357
SLC7A7	8.02008	0.00103633
H2BC4	-3.05242	1.14e-11
DST	-1.59954	2.07e-17
HPS5	-1.95368	8.09e-09
ATP5MC3	-1.07659	0.0311196
IFNGR1	-3.05341	0.0105683
TP53I3	2.5298	4.32e-59
	-1.09187	0.00131843
ZNF500	5.62391	1.57e-15
ZNF556	-8.96977	3.21e-13
HARS1	2.55395	0.0231682
CCP110	-1.76408	0.0139985
UBTD2	-1.45464	5.56e-22
GRAMD1B	-3.42673	9.91e-46
YBEY	1.73446	2.34e-05
RAPGEF5	6.09483	0.0479114
NPAS1	1.75169	6.59e-05
HMGN5	-2.08699	0.0221796
SORBS2	-5.32985	0.0172155
KSR1	-6.98724	1.27e-05
AREG	1.8055	5.66e-41
GGACT	4.28955	0.014332
TNFRSF1B	3.92086	0.0308339
EPC2	-1.28464	5.47e-08
PAK4	2.61066	3.61e-23
ABRAXAS1	1.57482	0.00778015
MTURN	-1.98478	9.26e-06
PLA2G12A	-1.99361	4.48e-26
ELP1	-1.10597	1.32e-06
TIMM50	1.99002	2.81e-07
NRIP1	4.32005	0.00302483
REEP3	-1.41521	5.61e-12
CARD16	-10.1674	2.12e-16
TRAPPC3L	-6.71692	5.32e-05
CREB3L4	-6.97831	0.00915909
IL32	-4.50281	1.5e-14
LRRC24	5.35057	1.28e-06
RASSF10	10.7259	1.15e-18
DEF8	1.83177	1.03e-14
ITPR1	-5.73506	7.12e-193
	1.57956	0.00177585
TRIM38	-1.75164	1.63e-31
TUT4	-2.48908	0.0248939
DSTN	1.71275	2.44e-162
GSN	-7.05912	5.39e-26
ZNRF2	-3.55426	5.57e-14
ENAH	-2.07656	6.4e-05
SLC35A1	-1.14106	1.83e-05
PCDH7	-5.34957	1.14e-31
PPIL3	-2.51159	6.23e-05
ITPR1	-6.31983	8.79e-18
SIRT1	-3.21483	0.00650226
GAL3ST1	5.71094	0.00504484
SLC29A1	1.88008	7.49e-07
PIP5K1C	7.15398	0.00748246
GPR27	9.00969	2.4e-12
IFI6	-5.6989	8.99e-56
C3orf80	2.30816	4.75e-05
NIPAL4	11.3672	4.9e-21
CARD8	2.38749	0.000472437
IMPDH1	1.25748	6.13e-20
PAM	-1.58565	2.44e-22
ZNF26	-1.34628	0.0281404
ADCY6	-1.12391	3.94e-13
STMN1	-7.06741	4.23e-05
FN1	1.58885	0.000268864
IRX2	8.01203	1.91e-08
EPHX4	-4.7984	8.69e-36
FLRT2	-1.36073	2.52e-07
ATF1	-1.65627	2.49e-23
FLOT1	-1.39304	0.00938052
ARMC8	2.0917	1.73e-06
MYEOV	7.21886	1.11e-44
	3.72415	7.69e-15
	1.58632	0.0209723
E2F3	-2.31775	2.24e-06
RANBP9	-1.82207	8.68e-39
PPP2CA	-5.398	3.53e-06
CYB5A	1.71371	0.000277835
NHS	-1.68712	0.000257007
CACNA2D3	-8.86153	1.38e-11
CACNA2D3	-9.0325	8.21e-12
CACNA2D3	-8.80428	4.85e-11
ADRA1D	10.9311	4.41e-19
MUC3A	4.1197	1.63e-08
HRAS	2.15268	1.29e-09
	9.0496	5.33e-10
RAET1E	-3.55265	1.4e-26
CYP11A1	-8.02261	1.44e-08
RAC2	-9.30065	1.95e-13
LIF	2.938	1.86e-84
NEK1	-2.13286	0.000415189
KRT10	1.2203	0.000406947
NT5C	2.7136	1.05e-07
MSMB	-5.51246	0.00938919
SFXN4	6.6652	2.46e-16
DOCK3	1.76578	1.06e-05
HYAL1	-1.90073	5.57e-06
NCR3LG1	-2.90295	7.02e-07
TRIM9	5.03755	0.0340017
MCCC2	-1.0604	2.11e-06
KLRG2	1.62552	0.00273271
DEGS1	-1.23483	9.04e-60
TNFAIP8	-1.01542	0.000573019
RPL27	1.04994	3.68e-24
DDX60L	-3.01553	0.000140788
DDX60L	-6.75831	0.0143466
FGF18	-4.17004	1.64e-14
SEC14L1	1.66085	2.88e-13
VRK3	3.65252	0.000439383
PSMF1	1.36183	2.62e-06
BIN1	-3.64014	4.88e-06
INPPL1	-2.18348	1.15e-12
INPPL1	-1.89392	4.23e-09
INPPL1	-2.6908	0.000224661
SDR42E1	5.97705	0.00184623
PNPLA8	-3.25206	0.0427386
COL24A1	-4.70184	0.002422
SCN4A	-3.17942	0.000178707
PYROXD2	-1.94593	1.79e-14
CAMTA2	5.57611	2.3e-16
CACNA1H	5.77377	0.00924326
NLRC5	-2.30202	0.0190164
PDE1C	6.28562	0.000981822
NRP1	2.10635	0.0159766
SEMA6D	-7.10399	3.15e-05
STEAP2	8.28821	2.14e-05
PGM5	-2.7822	0.000592595
SIAH2	-1.6079	1.56e-49
NXPE3	6.60723	0.0188157
TSPAN17	1.07152	0.000208388
PICALM	-2.16555	0.00781547
FBLN1	-2.66507	1.61e-57
DGLUCY	4.60854	0.00030389
NR1H3	-1.146	0.013938
STIL	4.47112	0.0049275
PCGF5	-1.01525	2.49e-05
LDHA	2.30167	0.0427162
ZNF490	-1.21336	0.00179906
TMEM139	-4.8966	0.000114562
TSPAN4	-1.5958	0.0446376
CDK17	-1.14895	1.15e-06
CDC42	-10.4612	2.26e-17
ANGEL2	1.15189	0.00112105
DPYSL5	1.18174	9.21e-08
GTF2IRD1	-1.8709	0.0185549
SOAT1	-3.79561	5.86e-98
TBX20	-2.54632	7.91e-08
SERPINA1	-6.11114	0.00104191
LYSMD1	-2.00316	0.00488511
FDPS	-1.49992	6.21e-78
DUS2	2.155	3.57e-08
MACROH2A2	8.00959	1.98e-06
CAMK2D	2.21578	1.18e-05
MPV17L	4.35053	2.18e-06
B3GNT7	3.05281	5.4e-07
FOXO1	-1.33574	4.13e-07
SLC7A11	-1.65671	2.81e-13
PATJ	-1.56513	0.00172577
	-7.3066	2.71e-15
MRTFA	3.55103	4.86e-20
DRAP1	1.61726	1.84e-18
MCMBP	1.3578	1.89e-44
SEC23IP	2.32428	1.9e-29
TMEM40	-5.88395	0.00907029
PLAG1	-5.10891	0.000932726
LRRFIP1	10.5329	1.21e-16
MBD4	-1.58201	1.43e-21
CYB561A3	1.18594	0.000163329
DST	-2.10679	1.93e-20
RPS2	2.70807	0.00359046
LMO2	-2.43196	0.000439267
EXO1	-1.06733	0.0258812
CCDC112	-1.64049	0.0146504
C6orf52	5.07222	0.033779
ANKRD27	1.41709	6.96e-33
TRAK1	-6.51208	0.0217832
UCHL1	16.2652	6.15e-43
PAQR9	8.81851	1.5e-11
IFT27	2.2396	0.00136528
HMBS	1.66525	1.44e-05
PAK4	2.70415	1.16e-13
TPT1	-6.6654	7.17e-05
BTG3	-1.87111	6.29e-06
CMTM3	5.42178	0.0134372
FES	6.08338	0.0442642
RBBP4	-1.00077	0.00117227
PAM	-1.10077	2.55e-06
DST	-6.83365	0.000388029
NAPRT	-3.59025	1.31e-83
ARHGEF28	1.82824	0.00350348
LAMTOR4	1.62993	2.94e-25
PCDHB13	-5.15998	6.71e-28
DSCAML1	7.07917	0.00774507
USP9Y	7.93318	6.9e-08
PLD3	2.18892	1.82e-18
SMARCA2	6.56756	0.000717399
FAM133A	7.35741	1.76e-06
EIF2AK3	-1.31801	1.24e-06
TPM3	-11.104	1.58e-19
ANP32E	-1.12826	3.79e-13
CNFN	1.55696	9.21e-08
ARHGAP42	-1.45137	1.17e-05
PPT2	-1.14698	0.0338275
SORBS2	-5.99925	0.047311
ZNF773	6.12849	9.65e-07
IFT122	6.57166	0.0187491
BEND7	6.13628	0.00284028
MEIOB	7.61332	3.66e-07
MPST	2.74612	1.53e-23
SLMAP	-3.6582	0.0190549
NECTIN2	1.52509	1.23e-18
NECTIN2	1.69605	7.73e-45
ABHD8	-1.66154	4.95e-36
NBR1	4.23262	0.010349
CAP1	1.2637	0.0306104
LTBP4	7.53978	0.000471962
PSMC4	2.6302	5.64e-17
COPA	-1.28882	1.25e-115
RIMS4	-1.89925	2.2e-47
HEYL	2.61897	4.6e-17
OGDH	-2.77613	1.34e-24
TSPAN14	1.96348	4.77e-48
STMN1	-1.61696	0.0116698
MME	-8.89959	0.0227619
BAG1	-1.98557	0.00199842
AHR	-3.29704	1.03e-46
TMEM8B	1.92369	0.00164923
KMT2B	1.35423	1.95e-06
SPMAP2	-4.78779	0.00176404
KDM4B	-1.864	5.59e-09
RGL1	1.15948	0.00192316
PRPF8	-1.13015	1.47e-07
SLC3A2	5.83803	0.0161425
MMP17	2.42719	0.0344921
CTSC	-1.64735	0.00436469
TNIK	-6.53537	0.00015171
SENP1	-1.21938	1.28e-05
SZRD1	12.5083	8.14e-26
SZRD1	14.0278	3.28e-32
KDM2A	-1.28273	7.62e-81
HLA-A	-6.41055	0.000290148
WAPL	-2.39853	1.25e-07
APOL6	-1.98361	1.15e-14
PGGHG	6.06079	0.00149415
GATD1	2.65033	0.00279469
TMCO6	1.19585	1.27e-06
LMTK3	1.75185	7.12e-07
ARHGEF1	1.11528	5.64e-36
DDT	2.16872	0.00664804
MFAP3	-1.1242	6.42e-07
INSYN2A	7.38227	2.67e-06
	-7.68213	1.92e-31
	2.04491	5.33e-20
TUBA1A	1.63771	0.018441
ST3GAL5	4.68798	6.15e-09
C1orf167	-5.32211	0.0159978
VIPR2	-7.48129	5.02e-07
LIG4	-6.10691	0.041248
MOV10	-2.56616	4.74e-07
SIN3B	-1.28585	0.00233436
CRY2	-1.18407	9.35e-06
ITPR2	-1.2308	1.79e-07
IDI1	-1.50575	1.6e-09
STRN4	1.19226	1.99e-06
LAMB3	-2.1664	4.78e-07
PDCD11	1.43528	6.32e-25
	-1.27803	0.000129364
DLC1	7.35474	4.17e-06
APP	1.69506	0.000156567
MYPN	-10.8557	5.15e-18
TMEM80	1.97891	3.45e-08
SSR1	-1.67686	5.49e-11
RTKN	4.8366	0.00133267
	7.45671	7.04e-06
BAHD1	-7.89687	1.39e-07
BAHD1	-6.32536	0.00117879
GRIK2	-2.58387	1.86e-07
LMNA	-1.74459	0.0147019
NTS	11.5924	3.24e-22
TRA2A	-2.18724	0.00023585
IRX2	7.99806	1.21e-08
PCIF1	1.06512	1.54e-12
	-9.52537	2.66e-14
NCAPD2	1.12448	1.45e-87
ADGRE2	-3.97577	1.67e-13
PARP8	-3.64915	0.0361076
WDR62	2.02961	0.0391985
OBSCN	-7.15275	3.33e-09
ST3GAL4	-3.89771	0.00150752
OTULINL	-3.27945	1.04e-109
TNFRSF11A	1.66056	8.02e-07
GOLGA1	-1.49788	6.89e-05
NRIP3	-2.91171	3.64e-18
SP110	-6.6692	0.000270008
FIBIN	-5.44126	0.0116501
HLA-B	-4.65517	7.88e-66
TESMIN	2.33187	5.04e-07
MAFK	-1.25267	3.51e-74
CCDC106	6.62543	0.000149529
RPL19	1.7107	0.00369024
RPP25L	1.99673	4.33e-13
TTC39B	3.13119	0.046975
ENPP1	-1.01052	0.0010637
ZFP30	-7.83974	8.72e-08
CELSR2	-4.67881	0.000629654
	-1.33499	3.13e-18
KCNQ5	7.11706	0.00738317
HMGN5	-5.38979	0.01312
BMP1	-2.3502	5.51e-05
SPTSSA	-1.23154	3.24e-12
DDR1	-1.04422	1.85e-05
TPMT	-1.47138	1.08e-17
ERRFI1	5.76084	0.0087105
GABARAPL1	-4.03402	0.00536522
ZDHHC12	2.13123	0.0121522
ZBTB45	1.70192	2.56e-12
KMT2A	-9.40806	8.04e-12
JUP	1.56484	7.91e-10
GABRB3	11.7074	1.01e-21
GDF1	-1.09975	5.57e-05
COL12A1	-4.19492	3.73e-76
SPART	3.79093	0.0119684
HNRNPH1	-7.08417	1.49e-12
DISP1	-7.99625	0.00112572
CACNG6	3.53752	1.2e-34
NR1H3	6.92132	0.0100057
MAGED4B	6.64788	8.42e-05
CHST15	1.34167	0.00973229
CD24	-2.27043	0.0439431
ACTG1	2.24757	8.06e-06
TBC1D4	-1.52407	0.00253079
RBMX2	1.18972	2.55e-13
BCORL1	8.8541	9.46e-12
APOO	3.45638	0.00737472
BCORL1	1.15562	0.00143906
DNMBP	1.09381	4.72e-12
COPS2	-1.24943	7.99e-08
SYP	5.62149	0.0113809
GTF2I	1.77861	0.000210561
THADA	2.01739	9.26e-21
GOLGA3	-2.58802	1.42e-10
CENPE	-1.7953	0.000148655
ANXA11	1.4145	2.3e-06
CCDC80	2.71019	1.57e-109
BAG6	-1.46075	0.00136519
DMPK	-10.9479	1.61e-19
IL17RC	-1.82852	2.84e-06
IL17RE	-4.33874	4.66e-08
CIDEC	8.54334	4.04e-10
XAGE1A	7.62183	1.42e-07
RNF128	6.48581	0.000296012
	1.54634	0.0448392
	-1.75399	9.26e-05
ZSCAN18	5.78075	0.00490085
RASSF2	10.4722	7.69e-18
EYA4	-3.53628	0.0294496
PRX	7.12468	0.00855836
DRAP1	2.55791	4.84e-10
RSPRY1	1.41547	0.0389761
PSIP1	1.10282	5.43e-14
PSIP1	1.33663	0.00215242
SLC16A6	-7.7824	2.48e-06
	-2.20992	0.000293495
MSLN	-10.5793	2.83e-67
	7.66355	1.91e-31
DYRK3	-6.12667	0.0401424
CRB3	3.35311	5.88e-07
ZNF616	-3.59463	4.26e-13
LAMA1	-5.62507	3.79e-11
PLCH1	7.77853	6.12e-12
RPL13	1.624	1.32e-15
ZNF324B	1.65598	3.97e-06
KAT8	2.44849	1.29e-13
RGS11	-7.00149	0.00914963
YAP1	-1.87625	0.00402386
B3GALT5	7.73902	2.74e-07
ACTN1	1.85745	2.94e-05
EFL1	1.33441	0.00338446
ZNF626	-5.80524	0.00381774
PPP1CB	-7.74484	0.00185663
AJUBA	1.09639	4.9e-36
CCN2	1.6942	1.38e-12
TRIML2	6.16901	3.19e-22
NR4A3	-5.82233	1.95e-07
NUP214	-1.55021	0.00896423
CAST	9.75595	4.38e-14
SHROOM3	-10.7701	8.24e-19
HMCES	-5.01565	0.036349
BCHE	8.80296	1.38e-11
CYFIP1	1.77655	1.58e-09
	-2.50306	0.0075729
OCEL1	6.46092	0.0240163
KLF11	-1.5611	0.00377743
CREM	1.54661	7.78e-05
SAP30BP	2.84583	0.0261719
PCDHA3	7.34444	2.25e-06
VPS28	1.03118	0.0162693
STAT5B	-5.78989	0.00633047
STAT5B	-6.84799	0.0125093
ZNF121	-1.78607	2.51e-09
NRBP2	2.73538	5.89e-06
RASSF4	1.74446	2.09e-05
RPL37A	5.87918	0.000133467
CRYAB	-4.04751	1.36e-05
PIP5K1A	-1.16961	2.02e-14
BEND7	5.73029	0.0056106
EIF5A	1.5417	0.00014472
APH1A	3.42309	0.0386336
SUPV3L1	-1.51585	6.08e-52
PODNL1	3.66915	0.0383557
ZNF691	3.58078	0.0491524
L1CAM	-7.48708	1.56e-11
STMN3	4.4873	2.46e-25
L1CAM	-7.28546	1.11e-08
BCL2L12	1.61426	0.000520244
ZNF432	-4.10353	0.00360379
ROR2	-6.44279	0.000235387
PSIP1	1.1881	4.53e-05
FBXL17	-1.01989	1.09e-06
VPS35L	-1.37681	0.00166227
GRAMD1A	6.27439	0.000645134
PTCH1	-1.14193	0.016956
CDC42BPA	-2.81594	0.0261292
C1orf115	1.02185	2.29e-14
FBXO9	-1.72838	4.81e-26
GRB7	2.95001	3.5e-11
CNN3	1.53096	6.77e-12
STX11	-6.52335	7.45e-08
BCL2L1	2.79131	1.31e-48
SUMO1	2.77932	0.00521238
PRKCD	1.26934	0.00449264
SPSB2	2.38155	8.45e-47
CHD6	7.58676	5.51e-07
PFKP	2.5259	0.000164173
SLC29A4	3.99378	1.5e-19
CAMSAP1	-1.30512	1.61e-06
RBMXL1	-1.61387	0.00184494
PCDHGA7	7.51306	0.00340267
AGPAT5	-5.26846	0.0211548
WFS1	-2.01902	7.14e-56
MICU1	-1.30521	8.2e-10
PCED1B	6.34125	8.4e-43
NFYB	-1.49788	0.00248431
TMEM116	-3.28476	0.00469005
SPDEF	9.50259	5.58e-15
AHCTF1	-1.36631	0.000217616
MLXIP	-1.01612	1.77e-18
PRSS21	-11.7685	1.11e-22
ACSF3	3.03149	0.00462684
GJA5	-4.6979	0.00245595
MISP3	6.94819	0.00997486
PABPC4	-1.01291	0.00108408
OGDHL	-4.32869	6.99e-07
TRIM28	5.67593	0.00644758
ABHD18	-1.4578	1.65e-08
TMEM185A	-1.34238	0.0101719
SUPT7L	-1.04975	1.25e-15
ARSL	7.41428	1.37e-06
ANK1	2.74985	0.0293807
TTC9C	1.98132	0.000409975
RYK	-1.2872	0.000241641
SH2B1	3.51204	0.0243246
GAPVD1	-1.64899	2.28e-08
GAPVD1	-1.4684	2.36e-08
MTAP	-12.7405	9.36e-27
C1orf226	-4.45459	6.53e-09
PLEKHA6	-9.87763	4.46e-09
PLEKHA6	6.40667	2.87e-26
PLEKHA6	-10.1571	2.59e-15
PLEKHA6	-7.04931	0.0095998
PRKAR1A	2.55816	0.0391423
DVL3	-1.12505	8.94e-32
DOHH	-1.4575	1.88e-06
SLC25A28	-9.71393	1.24e-15
PTPN18	1.43847	0.00176073
GABPB1	-7.36974	3.32e-06
FSTL1	-3.5322	3.57e-55
BCL2L13	1.41662	0.00541367
FDXR	4.4114	0.00203653
ERVV-2	-8.05337	8.58e-09
RBM18	-1.31457	4.68e-26
UBA5	-2.24207	2.49e-05
GRK6	1.31125	2.58e-30
PPP1CC	-2.9115	0.0379861
IL17RC	-3.27306	0.00119287
IL17RC	-1.21424	0.0265456
PLPPR2	-1.06679	0.0264781
TNFAIP3	-3.19076	0.00294828
CRTC3	-1.06543	1.45e-07
RECQL5	2.2078	0.00952616
COPB2	-8.11944	7.42e-07
KIAA1549L	2.32217	0.0101396
RIOK1	-1.252	2.31e-17
DROSHA	-1.73806	0.00306227
SNX13	-1.77869	1.91e-20
ANO5	8.79083	1.62e-09
POLR3G	1.9955	0.00274785
GABARAPL1	-7.04031	2.3e-07
MCM3	-1.13287	1.26e-28
MAP9	6.31699	0.029949
AKR1E2	5.88435	0.00660742
RASA4B	-1.18909	0.0178249
TCF7L2	5.12832	2.55e-05
IFT52	1.17786	6.75e-09
RBM24	3.18874	1.22e-15
IFT52	2.3326	2.12e-08
PPP1R35	1.21047	0.0131841
ZNF579	1.27602	4.16e-17
SLC15A3	-8.15793	5.67e-09
ZNF85	-4.93744	0.0436943
TEDC1	2.17944	2.09e-05
EHBP1	2.93357	3.67e-21
NAGK	1.48024	0.00372448
DDR1	-1.50817	0.00566943
POLR3H	1.32092	5.89e-05
MPDU1	1.72628	3.18e-07
MGAT4A	-1.28078	0.011763
NFKBIB	2.20139	3.69e-06
EGLN2	5.84407	0.00417017
DLC1	3.29031	1.53e-07
MYRF	4.81614	0.000917763
CDCA2	1.74274	3.18e-05
GALNT14	7.73014	7.52e-08
CLCNKA	-5.60646	0.00962723
MAGED1	6.85186	0.000215087
ZNF16	1.03347	0.000201114
SLC11A2	-12.8035	6.87e-27
CCL26	3.72804	0.0394776
DHRS13	-2.3844	1.86e-09
PSD3	1.84131	1.64e-12
TMEM86B	4.01829	0.000129686
GSTT2B	-5.77521	0.00608878
SIRPA	2.41506	1.74e-14
EML6	-1.4371	0.0175742
NSMCE4A	4.31391	3.99e-07
CHN1	-6.20991	0.0017599
ASPH	1.74653	1.62e-23
SOWAHC	-2.64802	1.37e-66
UBE2C	1.53945	6.88e-40
SOX8	7.09696	7.64e-06
ITGA2B	2.63094	0.000393275
OTUB2	1.52951	4.11e-08
UROS	2.22931	4.02e-08
SCAF1	1.09419	4.43e-19
MFAP5	-6.31093	0.000978806
KIF20B	-1.54005	1.6e-08
HYI	-5.1833	0.00323248
POLD4	1.12214	1.49e-06
METTL26	1.62617	0.00084393
	5.81459	0.0108858
DCLK2	1.08701	0.00336637
SCAMP3	-3.33999	7.8e-38
PPP1CC	-1.19367	0.0397637
ANXA2	1.59688	2.94e-54
NDUFAF6	-1.22719	0.013754
ATIC	1.66851	7.78e-05
	1.58683	0.0153643
CDYL2	-6.45219	6.64e-06
VSTM2L	5.88387	0.00519095
CDC42BPA	-1.1331	1.3e-11
PARG	-1.01591	0.0407944
IRF5	2.76626	0.0104476
TAP2	-1.00743	0.021952
AFAP1	-1.43269	3.61e-37
TM4SF20	5.96733	5.79e-29
TRIM33	-1.55227	5.22e-17
NBPF14	-1.38688	0.0018955
PLXDC1	-3.17244	0.0259306
ADD2	6.97062	1.57e-05
EARS2	3.33213	0.0355841
HSPA8	5.98268	0.0053593
TBC1D16	1.47772	2.5e-17
SLCO2A1	-10.3692	1.85e-17
TBCD	2.76052	2.12e-08
ZNF385B	-2.96712	0.00378358
ARMC8	-2.02262	0.00488344
LGALS3	-2.39875	5.51e-259
SLPI	-4.42213	3.44e-206
AKT2	1.56024	2.08e-14
ARSL	8.93436	5.5e-08
NYAP1	5.90251	0.00434935
NBDY	-1.01294	7.55e-16
LRRC49	1.31023	0.0440197
	-1.66682	2.15e-08
	5.46676	0.000672263
S100P	-5.4273	5.27e-274
ACLY	1.37855	1.65e-98
ABCC5	-1.44821	1.47e-19
BPNT1	-6.12589	1.69e-06
BPNT1	-1.10756	0.0058996
MT1X	4.75992	1.55e-90
OTUD7A	-1.55413	0.0113469
SYNCRIP	-11.0926	1.06e-17
PSMD8	1.78226	1.67e-13
NME1	1.74492	0.0124429
PARD3	11.0399	3.47e-16
PARD3	11.5152	5.92e-20
PEPD	3.3039	0.0425104
OAS1	-1.43168	6.95e-22
LIMA1	-4.33457	5.47e-23
ZBTB8OS	-2.79844	0.032082
SMTN	2.71872	1.7e-51
TRNP1	4.64692	3.75e-10
RNASEK-C17orf49	3.04139	0.00549551
SLC29A3	-3.24236	1.54e-06
CD55	-5.91003	0.00239023
CD55	-8.72594	1.03e-10
COPS7A	1.87044	1.4e-17
MARVELD3	5.09674	0.0303637
RPS6KA2	-3.47519	0.0240745
SSBP3	-2.63246	5.73e-111
RPGR	1.13875	0.0398572
ALKBH2	1.56484	7.88e-15
HSPBP1	2.63789	1.83e-205
GFOD2	1.52352	5.2e-18
ALDH3A1	4.25733	0.00250462
SP100	-2.17989	8.11e-05
DNAJC22	2.99792	4.35e-99
BDH2	-1.12174	5.1e-06
C17orf49	2.17011	0.00198867
CBX3	-1.87003	2.24e-05
CKMT1B	8.42035	8.5e-10
CASTOR1	3.29493	3.41e-15
FBXO4	-2.74256	3.33e-10
	3.46905	0.0272627
DEF8	1.82306	5.85e-10
KIF13B	1.51264	7.63e-12
EGLN2	6.68661	0.00114262
SPR	1.74304	1.68e-49
TAX1BP1	-1.07038	2.97e-15
ZFYVE9	-1.38325	0.00557299
AIMP1	-2.0733	8.68e-06
SMARCA4	-4.79249	0.00826217
PLAC8	-4.89837	0.00511084
SNRPA	2.94002	0.000357661
CTDP1	1.30922	0.000280623
SCML1	-1.98634	1.77e-15
SCML1	-7.14665	1.73e-05
RECQL5	1.30704	3.44e-05
RBM47	1.18593	0.00516825
TRNP1	4.57805	0
RBM47	8.98662	9.15e-11
TNS3	1.60784	0.00282657
MAN1A2	-1.57436	7.36e-07
NBR2	-3.05461	6.28e-52
ACADM	-5.4585	0.0116354
AGT	-6.76393	0.000236569
WDR62	2.5391	0.0248614
LGALS9	-5.36522	0.0012968
PRR13	2.33545	0.00185376
PPP6R1	1.07729	3.85e-29
LSR	-3.09397	2.68e-07
MAP6	-7.66165	1.06e-22
MLXIPL	-1.54429	0.00289137
NOP56	1.92647	1.43e-10
GNAS	-3.14302	2.59e-05
NINJ2	-9.72907	5.73e-15
ACSM3	2.73233	0.0450992
GK	-2.67607	0.000112934
GK	-2.66752	0.0170858
HIBCH	1.05362	2.81e-10
EDC3	-2.6686	0.0225593
MYO19	1.36888	2.48e-06
UNC93B1	1.0639	6.17e-24
PUS3	-1.04144	0.000203281
CREB5	-5.5729	0.00821717
SMC2	1.25989	0.00860777
EEF1D	1.76874	0.0452685
RPUSD1	1.42433	0.000288207
TMEM161B	-2.86577	0.00992415
PRKD3	-2.23143	4.57e-21
PRRC2C	-1.06281	0.000104979
MAN1A1	-5.67696	5.11e-07
PPP2R5E	-1.23133	0.0213626
ABCB7	1.73908	0.0104405
HSPD1	-1.31824	0.0114517
TCIRG1	-4.13498	1.2e-05
IGFN1	-8.53222	1.18e-11
FRAT2	-1.84953	8.42e-40
MIER1	-6.43954	0.0241958
DNAJC15	-6.58046	1.67e-25
DDIT3	-2.16104	2.92e-19
ERAP2	-1.64394	0.000235705
ZMYM1	-3.31926	0.00374369
PLCE1	2.81992	0.000145154
BECN1	-1.07711	0.00600103
ARHGAP22	-2.85631	0.0120196
FBLN7	-9.27001	1.21e-18
MBTPS2	-1.04451	1.35e-06
KBTBD6	-1.92218	2.72e-17
KBTBD7	-1.10984	0.000135338
XK	-1.83974	6.3e-08
PRPF18	1.18729	2.01e-06
DYNLT3	-1.29309	8.52e-09
TNS1	8.35552	2.65e-08
FAM117A	8.95253	6.04e-12
SAMD11	-1.93314	5e-06
FBXL6	3.97755	7.86e-05
KDM6A	-3.21067	0.0446033
GALNTL6	6.721	6.07e-05
LGALS3BP	-1.6776	5.74e-13
FAM111A	-4.36793	0.00449166
IFITM1	-8.44511	1.07e-09
PCDH1	-2.34477	2.05e-15
SETMAR	-1.79642	0.00128968
FBXL7	7.18015	1.51e-05
PTPRH	1.85615	8.68e-05
CGREF1	1.40713	0.000186229
LONRF3	-1.09664	0.000777317
HYOU1	-1.27441	1.69e-05
ALDH3B1	1.46369	6.68e-07
TBCD	1.72814	7.63e-44
BRIX1	-1.57001	4.35e-43
HP1BP3	1.10958	9.3e-05
COL8A1	-7.15637	2.77e-07
	-6.83098	3.68e-05
MAGED4B	9.13025	0.0194641
ARHGDIA	1.17545	2.63e-15
SLC38A10	1.29112	3.52e-20
KDM5B	-1.90257	1.48e-17
KLHDC7B	-6.84007	1.75e-08
RTN4RL1	2.18637	9.03e-11
CAMK2N1	1.66848	1.3e-21
CDA	-3.7123	1.3e-95
CORO2A	-2.26003	7.44e-29
POGLUT3	-3.80726	0.000132382
CRYM	7.80122	6.52e-08
ECHDC1	3.39562	0.00118888
INF2	7.05068	2.67e-05
CCDC80	4.92225	8.41e-05
PML	-2.0608	1.69e-07
WDR83OS	3.69459	0.000375547
G2E3	-1.56768	0.00699478
TRIML2	6.18094	6.92e-40
NCF2	-7.00585	3.84e-05
TNPO1	-8.32296	2.05e-07
CHPF2	-1.90385	1.35e-22
TFRC	-1.0796	3.09e-08
ZNF707	1.9699	0.000151305
SLC4A8	-6.54111	0.000155214
UGT1A6	-5.25776	4.28e-22
DFFA	1.35847	1.97e-07
ARAF	-1.13671	0.0149176
KIF9	4.58741	0.0126861
CHST7	1.40381	2.33e-13
ZNF630	-4.50217	0.0406517
RHOC	1.44305	0.0328349
GSE1	-1.21194	0.0154726
GSE1	-1.41189	0.000152436
TMEM117	-2.07034	6.29e-11
NTRK3	12.0876	5.96e-24
NTRK3	10.0449	8.32e-16
CAPNS1	8.26572	1.5e-07
PPIL2	-6.76235	0.0136401
GGA1	1.1842	4.25e-12
ATP10A	5.06151	0.0396119
	9.47436	6.03e-14
LITAF	1.01594	3.64e-55
	-3.91976	2.79e-05
	-9.84233	2.24e-12
	-5.72004	1.89e-07
	-4.79427	0.0140654
CD83	-5.16311	5.41e-110
BORCS8-MEF2B	2.79359	0.00668507
RBFOX2	4.59009	0.00118829
CLU	-1.08441	8.35e-22
C8orf76	2.01908	0.000912551
GOSR2	1.89749	0.00490707
AVL9	-1.80047	0.000113967
CYTH2	1.48861	1.57e-16
IL15RA	-2.7082	0.012674
RSPO3	-1.25889	0.000108443
AKR1E2	6.19072	0.00149054
COL6A1	-2.28818	5.18e-71
TEDC2	2.56678	0.0322417
MATR3	-1.0626	0.000318297
LUC7L	2.26908	0.00409026
ZNF34	1.68319	0.000292406
ARMC10	1.42068	1.51e-07
ELOF1	4.96032	1.92e-87
DNM2	1.1295	0.000372598
PLTP	-2.89484	0.0274722
NPAS1	6.16236	0.00133466
ZFP92	7.83526	2.89e-08
LRRC27	3.71456	5.26e-06
ZNF713	-1.6623	0.00632072
TMEM200C	-7.71857	4.66e-09
UTY	5.73809	0.00726813
GLI4	1.87328	0.0437031
RUNX1	-1.31961	3.61e-15
TOP2B	-1.8703	2.14e-05
CDKN1A	7.26378	1.54e-05
KCNS3	9.76433	3.46e-15
KCTD17	3.09461	1.63e-27
KCNH2	1.0424	0.00998994
SHROOM2	-2.35776	2.03e-13
ZDHHC21	9.26587	7.55e-13
IFT122	-5.99929	0.00525101
IGBP1	1.72014	0.000529524
ANO5	7.87677	2.33e-07
DHRS12	1.73068	0.0195743
RPS23	2.64089	6.79e-18
F2RL1	7.64477	3.4e-126
GALNT10	3.40328	5.44e-83
IL18R1	-1.98622	0.00178892
CCDC28B	-2.14167	0.0115507
GRB7	1.91075	2.53e-05
CYP4F3	3.00436	0.00358654
KBTBD2	-1.23642	0.00309731
AKR7A2	1.91723	0.018284
ZC3H12C	-2.51134	1.97e-07
ADO	-1.22956	1.38e-15
PCSK9	-2.31667	5.95e-11
FUT8	-1.69014	0.00302382
NPY4R	1.85836	3.87e-31
ZDHHC4	-4.05442	2.04e-12
CTSD	-1.48087	4.52e-48
SNX5	2.64486	1e-106
OTUD1	-2.1538	1.61e-23
TLE1	1.84216	5.53e-18
DR1	-1.41	1.17e-20
ZBTB8A	-1.19026	0.000498657
FAM53B	1.10985	2.02e-15
PTGS1	-3.33129	6.93e-14
BEGAIN	-5.51104	0.00841129
INPPL1	-1.57463	4.62e-63
ST3GAL5	3.68398	0.000162364
SLFN13	8.90527	1.49e-11
RBM47	8.81131	1.1e-09
RBM47	1.2203	0.000349045
PPP3CB	-1.38628	1.77e-07
SGSM1	1.4927	0.00431304
DCP1A	-1.28421	1.42e-15
ERMAP	4.66101	0.0328253
F5	8.96094	2.57e-10
NPBWR1	8.19382	9.83e-11
PDPR	9.8429	9.63e-14
PDPR	1.80818	0.000105963
RAP1GDS1	7.13123	1.77e-05
TRIM6	2.55411	3e-13
MTFR1L	-5.00171	0.0472142
SLC8B1	-3.33109	2.14e-07
KRT81	7.01394	1.31e-184
GLS	1.64399	1.09e-05
ADAM19	4.6601	2e-106
EBF1	1.98698	0.00772443
PDXK	7.8433	2.48e-07
TSPAN4	2.52461	4.88e-26
BATF3	2.4436	1.68e-11
GCNT3	5.67898	1.55e-153
PFKFB3	6.63417	0.000506238
SSH2	1.34405	0.00136704
RNF220	-8.66017	0.0266891
ZNF669	-1.78168	4.96e-18
LONP1	-3.47709	0.0449568
PRPF40B	1.29149	0.000402419
PXDC1	-1.47437	1.34e-21
DEDD	5.71094	0.00504484
FLNB	2.47132	1.96e-37
ACOT7	3.56402	4.79e-27
ANKRD10	-9.76803	8.83e-15
GADD45G	-5.39507	0.0135343
CAND2	3.36863	0.0313747
TENM3	-12.0585	4.27e-23
CDYL	-8.79987	3.32e-11
EML1	1.31779	0.000254127
ANGEL2	-1.38506	0.0268415
AFDN	4.9108	0.047002
C15orf48	6.75833	5.36e-05
NBPF14	-1.24508	0.00592326
NFAM1	-7.44039	7.56e-07
SBNO1	-1.39112	0.010723
NBPF6	-5.19103	0.0272727
ZNF28	-8.85422	2.93e-11
ZNF25	2.12455	0.000159731
MED29	1.6985	4.47e-86
ARL6IP4	1.49874	4.38e-41
YIF1B	4.75269	1.33e-15
BCOR	-1.77141	9.43e-17
TLE2	-2.93306	7.74e-05
ZNF165	-2.63366	5.01e-09
LSM12	1.63585	0.00427229
POLR1G	2.3758	0.0371591
MLPH	10.2375	2.51e-16
ISOC2	1.35946	6.12e-08
ANKDD1A	1.64669	0.0391234
SEMA6D	-7.17961	0.0062456
BCAM	1.2468	1.78e-18
CEP63	6.84513	9.61e-05
GLDC	9.8791	2.33e-21
TMPO	-1.10165	0.0147189
HNF1B	12.4726	3.82e-25
C5orf63	5.79196	0.00463958
THPO	-6.34602	0.000444202
ADISSP	3.8551	2.71e-12
MAPT	-1.79988	9.67e-06
MAP7D2	10.6842	1.09e-18
UHMK1	-1.79847	2.12e-10
CLIC4	-2.41275	2.01e-39
CD46	-4.42146	5.37e-07
ABCA12	5.97316	4.47e-16
ZNF599	3.93424	0.000256936
SLC25A39	1.0111	0.0239629
COPS7A	1.20208	0.00305867
STOX1	-1.62203	2.01e-07
NSMF	1.40145	3.45e-06
TMF1	-1.64611	3.8e-16
C6orf62	-1.89438	7.11e-22
FAM171A1	1.92227	1.33e-42
HNRNPH1	1.57908	4.9e-10
IGF2BP1	2.02528	2.31e-125
WDR45	-1.68406	0.00302685
PHF23	-4.68208	0.000268698
C21orf58	4.92561	0.0130296
DDT	-5.4575	0.0120947
TBC1D22A	3.88857	1.04e-22
INTS6	-1.60029	1.71e-12
TM7SF3	-1.88539	0.00492989
BICD2	-1.44899	6.11e-20
KDM5C	-1.07853	3.9e-27
HPS3	-1.04401	0.00359318
METTL4	-5.22882	9e-05
EPB41L1	8.36366	0.00042492
UGGT1	-1.16307	0.000182564
LGALS8	-1.18059	1.85e-07
TMEM107	-1.17665	0.00207246
PPP2R5D	1.82166	0.00809562
SHROOM1	1.05693	0.0480408
DUSP13A	-7.90112	4.88e-08
YY1AP1	-1.10756	9.9e-21
FGG	8.25961	1.32e-08
TASOR	-3.24037	0.00221881
YWHAH	6.1309	1.16e-08
SAP130	-2.41285	7.26e-05
TRIM4	5.96798	0.00785138
	-1.54199	3.27e-05
	-1.28221	0.000195558
DCP2	-1.28127	1.81e-05
SACM1L	-1.17723	2.12e-07
CLIP1	-1.33311	2.47e-12
TCF4	6.02391	0.00156599
SUSD4	5.73353	0.00601022
PXMP4	1.85509	0.00349612
CNOT8	-1.31485	0.0250974
ANO4	-7.94805	8.7e-08
LRRC4B	8.73392	7.73e-11
TRIOBP	6.30739	0.00152692
CHRD	-3.39135	0.000107598
PUF60	3.54857	0.0397199
CIC	1.14603	1.47e-07
LRCH4	1.29931	0.0172
EME1	1.18196	0.0141791
KIF23	1.68235	0.000282761
	-8.00071	2.08e-08
CCDC149	-1.57284	0.00228273
FBXL16	-3.60718	2.36e-06
PTBP3	1.42682	0.0114538
ZNF791	-1.36058	1.51e-10
MACF1	3.88555	0.0394853
FURIN	-1.93461	8.98e-07
MAN2C1	1.86163	0.000501751
PSCA	-8.30928	1.5e-181
INTS3	-1.62186	7.05e-70
ALS2CL	-2.98858	1.05e-59
THBS1	1.24762	1.5e-09
RALY	1.37703	8.52e-09
FIGNL2	6.40267	0.000274395
PCBP4	2.65562	0.0163523
R3HCC1	1.08447	2.35e-12
TBXAS1	8.10868	3.59e-09
IL32	-4.68998	2.78e-24
HKDC1	1.92674	2.58e-24
HDDC3	1.91461	7.19e-05
CARD8	6.07675	0.00320064
ZC3H14	2.44568	0.000477571
TMEM69	-1.5172	0.00134281
FAM83A	-4.44154	8.69e-179
USP47	-1.16831	2.94e-09
SCARF1	-2.94654	0.00360198
	4.02469	0.000249688
PON2	1.17053	1.22e-16
MRTFA	1.01571	1.13e-05
	-10.4885	6.88e-18
KLF7	1.98255	5.8e-18
ATXN7L3	1.05976	8.31e-12
RTRAF	-7.60624	3.57e-07
SPHK1	-3.29106	1.27e-45
INAVA	4.43479	3.68e-163
RAET1L	-9.10938	9.42e-13
FAM156A	-1.57972	2.73e-06
ZNF426	-2.3328	2.47e-07
DGKG	10.5085	7.87e-18
TLE3	-7.60202	4.91e-08
DNAJB11	-1.15946	5.93e-32
AIFM1	2.08169	6.22e-07
KIFC2	3.12057	2.22e-09
UFD1	1.49088	5.53e-17
	4.51558	1.29e-50
CDCA7	1.41174	6.02e-09
RGS20	3.62496	1.39e-17
SMIM10L1	-1.02957	0.0436079
SPOCK2	-2.35614	2.99e-07
ZNF580	1.2117	1.7e-17
ZNF544	-3.04459	0.000759974
STIL	-6.04557	0.00286024
CASP10	5.96274	0.00232725
MORN4	1.18721	8.04e-06
DGAT1	2.13506	5.87e-05
ELP1	-3.57987	0.0175686
CEP41	7.60154	1.08e-06
PLEC	1.05355	0.00283874
ENTPD6	4.69123	9.02e-16
GLS2	-8.55385	1.15e-10
GFUS	3.23036	0.00951111
LY6K	-10.1094	1.69e-53
SBF2	-1.3332	2.89e-07
DTNA	-7.59336	8.76e-07
SGCA	5.60207	0.00698677
CGNL1	3.11049	1.62e-08
	1.03017	6.87e-20
BNC2	2.21125	0.000118141
STK25	1.938	6.87e-32
CACNA1H	5.34165	5.12e-11
MED31	-1.54652	2.15e-06
KPNA2	1.32803	0.0289542
LAMTOR3	-1.50476	9.64e-07
SELENON	1.32343	3.18e-09
CLIP2	3.07967	1.38e-65
GRHL3	8.86716	9.69e-12
MAN2C1	1.60825	1.71e-19
P4HB	-7.53082	0.00401791
IL32	-3.91724	9.03e-05
ADISSP	2.7413	0.000372955
MEFV	-7.4554	1.69e-08
ATRAID	1.14632	1.54e-12
PYCR3	2.59021	1.01e-40
BTN3A1	-6.47481	0.000400609
FAM20B	-1.11208	4.9e-19
COL16A1	-2.14239	0.000712924
EYA2	5.31615	0.0194577
CHD5	4.9412	4.34e-07
CFL2	-3.83247	0.0127103
	1.59845	5.53e-06
DEF8	1.92966	1.12e-20
S100A10	3.64741	0.0183492
REV3L	-1.22321	0.000300789
PIGL	1.48317	1.35e-06
ADPRHL1	-6.78721	3e-16
ERCC4	6.74871	0.0142185
ZNF836	-4.87469	0.000473369
CCNT1	-1.60753	6.89e-24
SPHK1	-6.18677	0.000757069
	2.73049	4.03e-08
AKR1E2	5.90293	0.00307292
PHB1	1.13394	1.68e-18
TPX2	1.10941	6.37e-77
TSPAN4	2.27823	9.18e-07
SPRY3	-3.88882	3.68e-05
NSMF	-7.69902	0.00279573
MSLN	-6.12055	1.81e-06
AGAP2	3.96931	0.0169453
CEP57	-1.77263	0.000303085
SLC35A3	-2.62436	1.87e-10
ANKS3	1.75236	0.000658818
POLD1	-5.46816	2.57e-06
MID1	1.13965	9.37e-05
ANTXR2	-3.65326	0.000159757
DPF2	1.22317	3.58e-06
SLIT3	10.993	7.06e-20
TYW1B	1.40488	0.00190519
OSBPL2	-1.55449	2.5e-13
SRSF5	-1.13335	2.72e-08
ZNG1E	2.74465	0.0174611
C16orf95	3.01788	0.000453181
TP53I11	2.627	8.68e-05
POMT2	7.27058	0.00596318
MARCHF9	1.33459	0.0122825
NT5C3A	-3.72618	2.07e-27
NPY5R	5.67081	0.00736229
SMARCA4	-7.09984	4.62e-05
ABTB3	5.34685	7.86e-06
CD55	-6.13871	0
CD55	7.33106	2.7e-06
TTLL1	2.83718	8.43e-12
WLS	-3.68496	0.0179921
EBAG9	1.1971	0.0425099
FGFR1OP2	-1.83308	5.87e-06
PDE4DIP	-1.72122	1.15e-15
HYI	-2.12969	0.0268228
TRPC4AP	1.46437	1.23e-16
PHLDB3	6.08881	0.00419017
ATP1A3	1.74636	0.000923971
TCF19	-2.17284	2.06e-06
NGLY1	-3.38265	0.000579868
NRARP	-2.59653	3.25e-62
CYP4F11	-1.37125	3.02e-15
SLC1A5	1.14719	1.17e-11
GPRIN2	9.4831	3.96e-14
NUDT1	2.01812	0.00337301
DDR1	-7.02857	2.36e-05
SLC43A2	-1.47085	1.7e-06
SHOX2	-2.22282	2.33e-05
PACS2	6.02232	0.0469338
NPNT	6.85965	2.93e-05
SERPING1	-7.34465	1.58e-06
RUFY1	1.78748	0.000406026
LONRF2	1.37439	1.92e-07
MYCBP2	-2.29443	0.0464425
C8orf58	2.37968	4.96e-11
H6PD	12.2776	1.21e-24
COPG2	1.43388	9.51e-43
TEDC1	2.66429	2.12e-11
MAGED1	14.0264	2.09e-32
TEDC1	1.57421	0.000104231
CEP41	6.72642	0.0215996
KCNJ12	-3.84623	2.38e-19
ADGRG2	-1.86849	3.54e-07
ELK4	-1.62798	4.04e-12
BRMS1	1.96894	0.000302169
DGAT2	-1.27463	0.000702519
MRPS22	-2.20311	0.000915103
RAPH1	-1.38683	6.73e-09
RBM3	1.18461	1.1e-25
SSH3	-2.27775	0.00210197
FBXO6	5.31993	8.56e-27
PCSK5	5.9075	9.83e-15
KIF21A	2.66136	0.0203041
SYTL2	5.48077	0.0153284
DDO	-6.22018	0.000680838
MLLT11	1.63712	2.43e-48
C1orf56	-1.39693	2.11e-27
DDO	-6.07704	0.000234036
GRAMD1B	6.43791	4.63e-91
AK3	1.02444	3.64e-09
COPG1	-1.15907	1.22e-50
IL15RA	-2.74328	0.00503886
BACE1	-1.24543	4.06e-08
THADA	1.16852	3.91e-06
BTBD3	-7.5866	1.86e-07
MYEF2	10.7376	7.12e-19
THY1	8.43365	2.55e-11
ARSA	-7.88928	0.00134564
RASD2	2.02827	6.72e-11
NIPSNAP1	1.22854	2.62e-36
MCM5	2.17844	2.16e-31
STXBP1	6.60528	0.0200128
EPB41	-2.97004	4.43e-06
ENC1	1.52477	9.04e-10
ATXN7L2	-6.40054	0.000418704
TMEM147	1.343	1.07e-24
CGREF1	1.03371	0.017545
UFD1	1.1069	5.02e-08
BLOC1S2	-6.21659	0.00089782
	5.30737	1.33e-31
PUF60	1.30174	2.51e-29
FLVCR2	-1.61998	1.59e-16
PRSS21	-13.8206	1.55e-31
SF1	-10.8011	5.89e-19
RCC1	3.04089	3.55e-32
EFHD1	6.1118	0.00126017
NBEAL2	1.01714	0.00238735
RPS15	1.67144	0.0370935
SOX13	-1.56004	4.57e-09
EVC2	9.40473	7.13e-14
ESRRB	4.98969	0.0457443
CCNB1	1.68005	5.01e-05
KLF14	-6.95507	9.81e-10
KANK1	-3.51746	0.0235935
WASF3	-2.17537	4.77e-05
PDLIM7	-1.89588	2.25e-07
ARMCX3	-1.23166	2.37e-06
FRYL	-1.09941	8.69e-06
CACHD1	-3.43483	3.56e-35
MGAT3	5.47797	1.14e-07
ITGB6	8.03545	1.07e-08
PLA2R1	-1.20448	0.0323604
EML3	-5.8218	0.00335995
POLD4	1.47525	6.55e-08
COPS7A	2.16015	0.0233294
ZNF468	-6.12624	1.06e-12
ADARB1	-5.71944	0.00625685
DNM3	-3.13998	7.72e-14
BAG2	-1.41286	1.3e-26
TRPS1	-4.296	0.00218496
NDRG2	-2.71249	1.47e-15
SLC23A2	1.63552	1.38e-11
	2.01236	1.67e-12
FNDC3A	-4.97628	3.43e-121
UNC13D	-4.07923	0.00371181
RIPK1	-2.43231	1.88e-08
B9D1	3.09544	0.0108844
WDR53	-4.24529	0.0109119
UNC13D	-4.08694	0.000363021
MARK1	-3.76587	1.15e-08
GGA1	1.93635	6.06e-07
ADCK1	-7.09497	9.99e-05
RFC4	-1.11693	1.06e-29
POLD3	-2.68133	6.18e-07
MAST3	-8.73781	2.14e-11
ARK2C	-2.86966	5.58e-11
SLC22A15	-3.17305	4.06e-12
MAB21L3	-6.22375	0.000772833
CNR1	6.43165	0.00024287
F8A2	-10.9062	6.94e-20
AQP1	-3.52174	0.00103677
NOSIP	1.59654	2.67e-21
GRK4	-1.50971	0.00173104
TNNT1	3.85678	0.000290195
CCDC88B	-1.33337	0.00419714
SCAMP1	-1.37164	2.28e-05
AGPAT4	-1.01518	0.00306012
EEF1AKMT1	-1.02265	0.0138144
ALOX5	-9.66712	0.0133578
BCAP31	-6.98969	1.11e-05
TNKS2	-1.07761	2.62e-08
B3GNTL1	1.08142	0.00209707
EXOG	2.28944	0.0474729
RPGRIP1L	2.95952	0.00815987
CALCOCO1	-1.27857	0.00113469
INTS2	1.13407	0.0106571
PFN1	1.00499	0.0357906
NAT9	1.70999	1.75e-14
GAPDH	1.35949	1.42e-21
RAB14	-4.20494	0.00802352
GAL3ST1	7.68703	8.74e-08
ABHD14A-ACY1	-3.82547	0.000126981
IFI44	-10.0431	8.19e-16
RALGAPA1	1.03204	0.0475455
PCGF5	-6.20091	0.00110007
	1.51308	0.0173452
TRIM22	-6.00432	0.0488348
MED25	1.61292	2.75e-16
OSER1	1.02893	3.52e-09
MTARC1	-3.88904	2.37e-71
ALKBH6	2.18153	0.00133842
PTPA	-1.1255	2.26e-07
PFKFB3	6.12187	4.07e-07
SEMA5B	-5.16393	0.0356089
NLRP1	-6.78748	0.000104666
CEACAM6	10.3037	8.9e-31
S100A5	4.95859	0.0399772
PLEKHA2	-4.13432	8.45e-06
	-6.29324	3.73e-05
DNAAF3	2.47016	0.00998777
DZANK1	6.09126	0.00258115
RPS16	2.51034	1.29e-28
NRSN2	9.44714	2.37e-10
SMURF1	1.0168	0.00168808
STAT6	-1.50455	0.000363431
NCOR2	5.19101	2.21e-05
APBB1IP	9.62483	1.5e-14
CACNA1H	7.49954	5.25e-06
DENND2B	-2.65334	1.19e-15
CFH	2.29891	1.65e-09
WDR97	2.49303	0.0300836
ZMYM2	-1.24477	0.000103028
GAL3ST1	6.16823	0.000883628
SELENOW	1.20496	0.000248037
SOCS4	-1.06354	0.03416
PCED1B	7.36909	3.68e-11
HEATR5A	-2.50449	7.25e-74
TMEM179	5.11241	0.0292093
PKN2	-1.90428	4.82e-13
RBBP6	-1.1464	2.15e-09
MTLN	11.8439	3.48e-23
TNFSF12-TNFSF13	-8.09841	6.5e-08
TNFSF12-TNFSF13	-6.21429	3.05e-10
TNFSF12-TNFSF13	-2.22141	3.81e-06
TMEM33	-1.03242	1.51e-07
INO80E	1.68223	9.25e-05
ASPHD1	-1.31085	7.52e-06
ARHGAP20	-5.11562	0.00107516
ZNF444	1.22207	1.77e-08
MDH1	-1.68355	0.00544907
ZRANB3	1.27535	0.014473
MANSC1	6.61058	0.0232092
ADA	5.13152	0.031785
RABL2A	5.20385	0.0307468
CDK5RAP3	2.56249	0.000204401
PALM2AKAP2	-1.32614	2.1e-31
FGFR4	2.31708	0.0476107
BCS1L	1.56944	0.0102861
MAPK9	-3.46886	0.0354791
LLGL2	-5.10185	5.29e-05
NR1H4	5.11859	0.0277295
PURB	-1.68376	7.06e-18
PROCR	5.56952	2e-07
SLC52A2	1.62572	5.94e-06
H4C8	-1.984	0.00073078
MANBAL	1.49208	3.22e-18
NEK6	1.16119	0.0457068
YWHAH	1.97977	2.3e-119
SOGA3	6.84125	0.0122196
PLSCR1	1.17055	0.015715
PSORS1C1	-4.54291	0.01715
RPH3AL	1.52166	0.028668
NXT1	1.28548	4.26e-14
NAP1L5	-1.90527	5.51e-07
OPA3	2.55698	9.02e-11
MSI2	-1.56715	4.84e-10
CYFIP1	6.48342	0.000229287
ISYNA1	7.28639	7.12e-06
ARMCX5	1.98146	0.00974476
KCNK5	1.02398	0.00147238
SYT13	7.61005	2.15e-42
PELI2	-1.56949	0.000378177
DHX32	2.11816	0.0387968
YWHAZ	2.21635	5.68e-06
SEMA5B	-7.00546	1.45e-05
MARK2	-1.72097	0.00751327
ESPN	-5.7964	0.00500599
PSMC4	2.17653	1.23e-83
FGA	11.3234	3.64e-20
TMPRSS3	-10.2394	6.73e-17
SMOC1	-6.25629	1.71e-54
TMEM80	1.09762	0.037365
USP5	1.32947	1.36e-62
TBC1D16	1.29809	0.0395571
TBC1D16	1.69953	3.74e-09
NXPE3	1.68233	0.00269306
UBOX5	1.32071	9.92e-06
GGPS1	-1.59022	4.87e-24
CACNB1	-7.92789	2.04e-06
PIK3C2B	-2.97474	4.28e-196
C18orf32	5.29707	0.0179085
PTHLH	6.41846	0.00155015
BMP7	7.72996	3.48e-09
VCPKMT	-1.62317	5.5e-05
AGAP3	-1.73765	4.18e-07
	1.08247	1.83e-08
ELOVL2	10.4418	5.18e-17
DIDO1	-7.07847	1.06e-05
CTCF	6.05639	5.18e-10
ECT2	1.57972	1.08e-22
AGO2	4.91215	0.022408
SERTAD3	1.8036	0.00568483
C2CD5	3.90436	1.35e-05
NPAS2	1.86963	0.000198017
CABYR	9.7286	4.55e-15
ZNF638	-1.42211	0.0318343
KYNU	-1.30778	1.44e-12
DAB2	6.62855	0.00022174
CCT3	5.75317	0.00481968
FANCB	-1.27335	0.0097577
ZNF283	-1.53535	0.0406613
IRX3	-2.86914	1.19e-10
STRIP2	-1.18452	6.16e-07
SPATC1L	-7.44211	0.00418532
MFGE8	7.12097	7e-05
SDC2	-3.69499	1.62e-28
IL15	-1.79901	0.0230957
SLC12A4	-1.24615	9.4e-17
TBC1D5	5.39473	0.0160578
PGF	2.45689	0.0376109
LRP1B	-7.03291	2.46e-07
ANKMY2	-1.28386	3.83e-16
DEDD2	1.95511	0.0310831
TLE2	-3.64404	0.000470189
	8.9268	8.5e-12
NEDD4	2.89847	0.00675929
ACKR3	-3.25259	0.0494328
DMTN	8.9494	0.0220112
FBLN7	-4.9699	0.0347822
PIK3C2A	-1.68709	0.000193606
ETFRF1	-1.35774	0.038849
HLA-F	-3.48648	0.00221116
SLC26A6	-1.5696	0.0233739
MAP4	-3.28017	5.54e-30
PGM3	-1.3962	1.48e-12
CYP24A1	7.79902	1.9e-285
C2orf15	-1.79214	0.000263107
TM2D1	-1.10333	3.5e-06
SNRNP48	-2.35266	1.15e-33
DEPP1	-3.45346	0.0052879
NEMP1	-1.25546	1.03e-05
PRR15	-2.68967	5.72e-51
KRT16	-2.01844	5.63e-05
DAB2IP	4.46832	0.0447448
AKR1C3	2.86676	3.22e-117
KIAA0319L	6.97985	0.00951033
EPDR1	8.31103	1.05e-09
MRTFA	2.04348	1.67e-33
SHOC1	-5.90187	0.00385122
MTERF2	-1.39095	0.0469549
VEPH1	-5.91732	0.00623175
VEPH1	-4.29131	0.0253035
ZNF524	1.908	1.57e-25
ZFAND3	1.50993	1.68e-06
SERPINH1	-1.63991	1.07e-37
NAPB	1.31825	0.0307114
EEF1B2	1.18396	4.74e-07
ARHGEF3	1.60209	0.041812
RRAS	2.79415	8.31e-71
FTCDNL1	1.61853	0.0111681
EEF1D	2.65609	0.0276402
ANK1	6.27347	0.0356803
ENTPD8	-5.04817	0.0365791
TBC1D1	-2.09212	0.00896604
HSPA13	-1.23	2.83e-08
RO60	-1.5256	2.73e-07
CSTF3	1.17197	5.87e-27
RNF215	2.66501	0.000212525
STAT1	6.49824	0.0283123
USP18	-1.70096	1.82e-46
TMEM68	-1.68369	0.0136069
SLC66A3	1.10833	7.51e-05
MAPK4	-3.0367	0.00921144
GGT1	1.32293	2.39e-08
ASL	3.89165	6.68e-10
EMC9	2.60916	0.000283729
SERPINB8	-2.04008	1.47e-13
ZSWIM8	-1.91141	5.12e-38
ENO3	-3.6808	4.11e-66
CAPN5	2.19897	5.11e-23
ANK3	-5.59028	4.02e-05
NHSL2	5.22916	0.0026238
ASTN2	1.50786	1.32e-05
HS1BP3	2.56579	1.29e-05
CHRNA3	2.18901	0.0279114
CYB5R3	1.25145	6.5e-14
ZNF768	1.00841	8.82e-06
PNPLA1	-8.03369	8.51e-09
	1.01057	1.09e-05
IP6K2	-3.74544	1.54e-10
EYA2	7.88918	0.00155699
MYCBP2	7.08099	0.00984925
	10.1575	1.9e-16
	1.30022	0.00178497
TIAM1	-2.34893	0.00176831
PPP2R5D	1.97765	9.04e-05
RB1	-1.42217	7.29e-15
MYLK	5.63776	1.31e-10
PPP1R12C	1.63089	3.68e-07
C5	4.96482	7.63e-09
ZNF517	2.08317	3.01e-06
DNAJC19	-2.31426	2.54e-06
SLF1	-2.04601	1.46e-15
POLR3B	-1.1462	3.43e-11
MARK2	-2.47286	1.62e-09
ZNF584	4.20572	0.0109407
U2AF1	1.06547	1.2e-22
B4GALT7	-4.23844	0.0327931
PIGL	1.84311	2.58e-05
SNX8	1.48773	9.37e-48
C2CD2	-1.63968	1.04e-09
BFSP1	6.0849	0.0470675
MUC12	3.95722	1.23e-06
MIB2	-1.24543	0.0269792
DPYSL3	10.1451	1.36e-10
CAV2	2.34925	7.39e-05
POU3F2	-6.69538	1.78e-06
DMPK	11.7375	9.24e-22
DMPK	11.7063	2.32e-22
CYB561	1.39499	0.0121035
CD14	5.85701	9.07e-10
DDX1	-4.092	9.43e-60
HOXA11	-5.60961	8.49e-14
VEGFA	-1.0145	8.52e-08
STARD3NL	-7.30525	0.00476717
BCL2L1	3.5045	0.0339608
LENG8	1.48404	4.35e-07
TBX1	-6.44482	0.000316896
CDKN2A	-11.5436	6.15e-22
RNF146	-1.08006	0.00950341
MCTP2	-6.43972	0.000596236
TMEM52B	-9.53761	6.88e-14
CDKN3	2.35807	0.000957339
TBP	-1.01592	0.0359851
HPS6	1.94112	2.79e-47
LCMT1	3.9728	4.79e-19
NBPF14	-4.01458	1.9e-37
SETD5	-2.33891	2.19e-07
CLCNKA	-7.12839	4.59e-05
TJP1	5.92938	0.00829185
PDK2	-6.69943	0.0241719
ITGAX	-1.80259	0.0204841
GCAT	-2.98004	0.000635831
MAP3K12	1.15731	1.76e-12
CCND3	2.56631	0.0291337
PALLD	-4.18991	2.46e-06
ADORA1	-2.65724	0.00123957
JPH2	-2.87886	9.66e-52
AFG2B	-1.98238	2.18e-21
ELMO1	1.00121	0.00797031
MAP4K4	-1.03813	0.00122499
MAP4K4	-6.7506	0.0240494
RAB39A	5.27667	0.00139726
UBE2M	1.13212	5.99e-16
TRIM28	1.76766	1.14e-35
SDK1	5.24874	5.99e-11
RC3H2	-1.82457	0.0202165
ERCC6	-2.70499	5.01e-11
ANKRD6	6.24028	0.000993602
DOCK6	-1.91499	0.00145222
EEPD1	3.44913	1.29e-88
HK2	-5.14112	4.02e-63
SORBS1	-5.04142	0.0341057
	1.12595	2.96e-09
IBTK	-6.415	0.0258921
CTDNEP1	6.42636	0.000892382
PVR	1.81062	7.01e-71
NANOS1	-1.70006	7.44e-05
EIF4EBP2	-2.05364	7.4e-154
RPS27A	2.17558	0.0109032
PES1	3.61012	0.0181411
PDE1C	6.20707	0.000735495
CTNNB1	-1.15761	2.98e-24
PDE1C	7.75933	9.48e-08
TMEM91	3.80328	0.043359
CCNA1	5.21483	0.0261453
SLC29A4	4.1021	5.98e-17
AGBL2	5.01299	0.0344219
DSP	-1.78066	1.91e-41
TSPAN14	6.67464	0.016592
INAFM2	-3.00253	6.31e-52
CHCHD7	-1.68985	0.0146508
DNAAF3	2.66138	2.57e-06
FOXRED2	1.56653	0.00313978
DHRS4L2	2.7662	3.98e-09
FAM168A	1.90891	0.00254404
MPND	1.4363	0.00454267
ITPR1	-6.37063	5.18e-81
HNRNPA3	1.24111	2.14e-12
RB1CC1	-1.08329	0.00562772
HNRNPA1	-1.29499	7.42e-07
CPED1	-8.78974	1.53e-11
LIF	2.5252	8.89e-30
HSD17B4	-2.38809	0.040956
RBBP6	-1.51303	1.66e-10
TREX1	-2.64831	3.05e-08
SSC5D	-1.0653	0.0344496
CRYBG3	1.34066	6.37e-06
ATXN2L	-1.09823	1.61e-05
CPNE1	1.05139	1.87e-10
SCN9A	5.68012	0.00833077
NOS1AP	-2.92323	7.68e-06
NOS1AP	-2.66775	0.0017607
ZDHHC16	1.61187	0.0212026
CTNNB1	-2.17101	5.56e-05
ADPRHL1	2.77389	0.000406609
FYB1	9.2442	7.13e-13
NPLOC4	6.30171	5.56e-12
MYCN	-3.67535	6.76e-05
VMP1	1.96286	1.39e-06
TEP1	-2.55177	0.0215172
HS6ST2	-5.58727	0.011692
OTULIN	-1.61223	2.81e-23
HS6ST2	-1.6591	3.9e-07
PLXNA4	3.441	0.0187415
NAPEPLD	7.78721	6.08e-07
NAT9	3.17318	0.00062234
ZNF136	-2.86494	3.47e-10
PDHA1	-1.73637	0.00179419
HMGCR	-2.58043	3.26e-05
DTNBP1	-1.53322	0.0414405
BLTP2	1.19866	8.49e-14
GPRASP3	9.07481	1.06e-11
STRIP1	8.53578	0.0289515
GLUD1	-9.77888	0.0123245
OR6C74	1.1386	0.0423025
AKR1C1	1.53952	2.85e-10
NCOA4	-7.51912	7.66e-07
EFNA5	5.93919	0.0022472
STK11IP	1.26153	2.58e-17
SIRPB1	5.28478	0.0243412
POLL	3.0419	0.0274733
E2F3	-1.69724	4.04e-06
TSEN34	1.83326	1.23e-09
LIPG	-5.9446	0.0038941
PLEKHA7	-1.79147	8.68e-15
BID	1.34962	0.00579131
PCDHA4	9.17815	3.07e-12
COX19	-1.1272	2.54e-15
C5orf34	-2.83595	0.0151577
LARP6	2.68163	0.0011773
	1.11405	1.44e-11
TBCB	2.54748	0.0271016
ARHGAP45	-7.72223	1.59e-07
KRT18	1.71305	4.62e-07
BEGAIN	-8.0397	1.9e-06
PLEKHA4	-5.37278	0.0149597
GP1BB	-3.00769	3.69e-15
LAS1L	2.35266	2.4e-18
OBSCN	-3.28543	7.26e-17
ACLY	1.38332	2.33e-56
	-5.4125	1.06e-09
GPD1L	-3.43146	0.0410982
NAP1L4	-3.06081	1.34e-11
DHX34	1.24728	6.61e-05
DHX34	1.96557	0.0208435
ASAP1	2.87934	9.79e-10
FZD2	2.28464	2.21e-98
BCAS3	2.37065	4.24e-06
RPL28	4.4505	0.0211459
CD38	9.78317	5.22e-15
ODAD2	-6.88025	0.0110117
ARHGAP44	-2.02795	0.00012109
TINF2	6.26468	0.0333312
EMP3	2.24923	7.46e-90
CHRD	-6.17117	0.0394637
PLEKHG3	1.57551	7.27e-17
GLYCTK	2.07268	0.00023875
TNFSF15	3.27736	1.34e-07
PACSIN1	4.14233	0.00721883
IQCN	1.48141	0.0428678
MVK	-1.71059	0.0368058
SH3RF2	2.33509	0.0335862
RARG	-1.17659	2.4e-07
RAD21	-2.43605	5.27e-20
HRAS	1.28335	5.47e-09
FAM8A1	-1.90841	0.00015298
KCNQ5	5.24572	0.0316963
TPP1	5.32035	0.015882
SOGA3	7.57458	1.1e-08
IGF2R	-2.32954	1.41e-34
ADAM15	-3.4483	1.97e-24
OASL	-11.6271	3.18e-57
	1.01514	5.4e-12
EMC1	-3.61529	0.000354078
TFAP2A	-1.26512	0.0037591
CIBAR1	4.2774	0.000283624
MAST3	-1.33207	0.0101126
TMEM59L	2.45604	3.22e-09
MED12L	5.02897	0.00515138
FKBP11	5.22452	2.55e-17
PITX2	-8.46678	3.55e-09
KITLG	-2.1392	9.14e-11
DMRTA2	-7.64969	1.64e-25
THADA	-5.51052	0.0095347
MYO6	-8.19141	6.25e-09
TOX2	5.14115	4.96e-05
IFITM1	-11.0859	1.09e-51
LSM6	-1.36403	0.00726422
HMG20B	-1.79713	4.31e-22
IL1A	-4.48883	0.00023495
ZP3	1.40182	2.66e-13
GSDME	-1.54996	0.000357472
FBL	7.57045	3.74e-06
MGME1	5.26355	1.95e-15
RPL18	2.87008	8.84e-09
CTTNBP2	8.63718	6.49e-11
WDHD1	-1.95579	0.0052267
QPRT	-6.67076	3.15e-123
ETFB	2.37589	0.00303969
DEDD2	1.68828	3.13e-15
CDC25A	-1.67185	5.65e-12
KANK3	6.29772	3.5e-16
ADD2	11.9522	1.08e-23
CUX2	4.41638	0.00244666
PTPN6	9.05889	1.62e-32
TBXA2R	-4.35029	1.95e-14
GMPR2	1.59749	1.1e-13
OSBPL1A	-1.91414	2.12e-21
ANKHD1-EIF4EBP3	8.81132	0.024147
KRI1	-5.51449	0.0201302
ACOT13	1.21687	0.0396681
ALKBH2	4.20435	0.0153903
ZCCHC24	-1.89447	1.04e-22
KCTD20	-1.1429	0.0230058
OPTN	-1.11747	0.00210841
ATAD3A	-7.22596	4.92e-05
COL4A3	-3.11839	1.55e-15
LRP8	-2.2772	0.00395605
PCMTD2	-1.63391	3.14e-12
TMEM216	-8.60471	7.41e-11
RNF167	-1.01415	0.00119124
APTX	5.6041	0.00982693
MARCO	-6.03273	6.92e-05
REST	-1.52309	0.0106746
TSEN2	-6.02214	0.0461198
RER1	1.2114	0.00160139
TGFBR1	2.01404	2.37e-25
HAUS3	-1.23977	0.00205774
DNAJC21	-1.82872	4.07e-11
IFI44L	-9.78258	8.74e-15
SLC4A2	5.41407	0.000976392
AGPS	-7.58121	1.07e-06
	-1.68709	4.06e-10
NCF2	7.56103	0.00290572
ACIN1	-1.82779	0.0131633
GOSR2	1.29976	0.00248864
LIMCH1	-1.48981	2.65e-15
TDRKH	8.85876	3.89e-11
TDRKH	-1.57966	1.04e-08
CMC4	-5.894	0.0130873
DAG1	-7.93129	0.00130184
ZNF266	-3.91893	0.0092951
A4GALT	-2.81371	4.96e-14
ZNF675	-1.47407	5.92e-06
MB	2.20879	0.000792931
ERCC1	5.38296	1.52e-09
KIAA1671	1.20075	5.15e-11
ATP5MC1	2.29279	0.00549374
ZNF419	6.2617	0.000651055
SLFN12	-6.68952	1.36e-05
TMBIM4	-2.13966	6.95e-19
FGFR4	3.16063	2.09e-10
SLC39A14	-3.97053	0.000875039
CDK10	1.37734	5.35e-05
RBM28	1.39256	2.55e-09
GAREM2	2.54949	3.62e-38
SDC1	2.16979	6.32e-88
ZYX	2.4341	1.14e-12
NCOA4	-6.22792	0.000771667
POP4	2.06871	5.31e-41
TRANK1	-3.80256	9.14e-117
FLNB	1.98706	9.17e-16
NUB1	-1.07508	8.37e-05
TMEM120A	2.80988	0.048399
MMP7	4.2803	7.6e-100
IAH1	1.0276	1.53e-11
MAGI1	3.64445	0.00326893
INPP4B	7.80837	1.49e-12
PIEZO1	-1.28179	8.18e-20
LY6K	-4.07968	6.21e-07
EFCAB10	5.88188	0.00277786
RHOBTB3	-5.27733	6.29e-13
CDH2	-8.34563	0.000518381
ERCC6	-3.32799	0.00333385
EXOC3L2	7.65839	2.07e-07
TMEM259	3.39712	1.07e-11
AP5S1	2.1956	2.63e-06
PDPK1	-6.6165	3.03e-12
RNPEPL1	2.86147	1.2e-13
MLF2	6.39539	2.46e-07
ARHGAP21	-1.53794	0.00358597
FBXO32	1.8622	2.25e-05
RNF170	1.61977	0.00177933
USF2	1.37705	4.36e-05
VLDLR	8.19591	9.14e-09
MINK1	-1.38002	2e-10
FKBP11	3.73564	1.27e-06
CWC27	-3.53225	0.0483001
SLC29A1	2.03037	5.96e-09
SLC29A1	1.55801	0.000193366
MAP1LC3A	10.1175	3.36e-16
CDK4	-2.82401	0.00744445
STYXL1	2.8008	1.03e-11
SNAPC4	-1.13563	2.07e-07
KCNN1	3.1614	0.0489757
DBNL	-2.0149	0.0137358
PMEPA1	10.7717	2.93e-18
PON3	10.7165	9.46e-19
SIRT2	2.47529	0.0234865
TMBIM4	-6.74973	0.0146413
TCEA2	-5.75085	2.8e-12
NME4	1.8279	2.58e-06
ZNF562	-1.14297	0.00121234
SIPA1L1	-3.25908	5.85e-44
TBCB	2.43565	0.00012683
MON1B	4.36832	0.000667401
C8orf48	5.30604	0.0173414
SNX21	3.64219	0.0016102
PKMYT1	1.14076	0.0122277
VRK3	1.83457	0.000915393
NSDHL	-9.02807	0.0208696
ADAM23	4.69424	2.04e-12
RGS3	5.63178	1.6e-71
MARS1	1.06365	4.9e-05
ALPP	-11.4447	2.87e-195
SERTAD3	2.4373	0.00536003
ALDH3B1	-2.74937	2.96e-06
SLC52A3	-2.77484	0.0192202
TMTC1	-7.07217	0.00775674
TMED5	-1.25624	0.0447487
ZMIZ2	-1.01081	2.23e-05
NR2F1	-4.24574	4.27e-64
RPSA	1.5525	0.00649615
	-3.94683	3.02e-49
NMB	9.84422	3.65e-16
UBN2	-1.59421	4.36e-08
SLC22A5	-2.26425	0.00183624
ADPRHL1	2.19827	3.12e-23
MYC	-1.40493	0.0490353
SBNO2	-5.19636	4.71e-09
SBNO2	-3.37112	1.25e-10
SBNO2	-3.13099	6.98e-06
ARSL	9.33651	8.68e-13
GMIP	-1.51308	1.77e-08
FYN	-4.57959	3.25e-16
MKNK1	-1.76283	0.000211542
GUSB	-1.23588	2.68e-10
SGMS1	-1.41495	9.06e-08
RNF13	-1.78177	0.00553679
SLC25A22	-2.97543	0.00637783
NEK2	4.92561	0.0413432
PIMREG	1.34423	6.99e-11
GGT1	2.22677	0.0494395
CBS	-1.43984	0.0150983
ERF	1.84744	3.7e-72
NECAB2	6.44923	0.000822909
SIGMAR1	1.06688	0.0014043
SDF4	1.08221	1.06e-07
FADS2	5.37154	9.29e-19
CDC42	-2.98233	4.66e-11
EIF4EBP1	1.59481	3.91e-18
FOLR1	-10.7065	9.02e-19
UBE2H	-1.11636	3.07e-13
TLR4	-7.05038	6.14e-37
TRIB1	1.06363	7.74e-11
HS3ST1	3.08178	1.25e-07
IFITM2	-3.10807	2.92e-48
EPB41	-1.2457	5.16e-20
EPB41	-11.1463	2.63e-20
ANKDD1A	6.91939	1.87e-05
PHB1	1.91551	2.13e-07
RECQL4	2.30683	7.35e-34
PTGR2	1.97036	0.00270344
ATRX	-1.65584	0.000127107
RGPD5	-1.48365	0.0225936
CEP43	6.28243	0.000968804
	-1.77824	4.45e-05
RALGAPA1	-1.66963	1.26e-07
H2AC8	-7.81867	3.32e-08
EPB41L2	6.8541	0.0121882
HTR2B	4.68962	0.0102004
NMT1	1.80906	0.00989105
HMGCR	-1.94586	0.00148162
MAP2	-4.01844	1.94e-18
TRPM6	2.12684	0.00411401
MARCHF6	-1.95994	4.76e-11
ADAM15	-4.12174	1.04e-34
MRS2	-1.61365	1.4e-16
ARHGEF39	2.32615	0.0388694
ANKEF1	10.9308	5.08e-19
NOB1	1.03868	3.05e-14
DUS3L	1.674	0.000137708
DCAF16	-1.18362	0.000198182
FAAP100	2.02673	1.74e-13
TCAIM	-5.39405	0.000865592
TGIF1	2.16711	1.17e-05
TWIST2	1.33	0.0315165
MORC4	3.44868	8.25e-147
MORC4	4.90041	4.6e-26
SLC5A11	4.71021	0.00598823
TMEM158	-1.27075	1.14e-07
EIF3K	1.92905	3.88e-56
AKR1C4	6.78735	5.02e-05
ICAM1	-7.0399	2e-68
OLFM2	7.63829	1.41e-07
CACNB4	-4.99561	0.00440721
PQBP1	-10.311	5.39e-17
SERPINB4	-4.32943	0.00862882
MORF4L1	1.10523	2.76e-06
MIS12	-1.12726	1.01e-05
PLD2	4.66151	0.0316154
OAS1	-2.77516	0.0266988
PRKAA2	-1.2159	4.68e-08
FNIP1	6.05038	0.0445806
UBE2Q2	1.39801	0.030696
CACNA1H	6.62338	0.000524012
CACNA1H	5.64837	1.1e-05
BTN3A3	-6.83489	7.59e-05
FLT4	5.57268	0.00833436
RPL13A	4.41069	0.00766648
EMSY	-2.48745	7.07e-06
HERC5	-2.84719	7.73e-16
OAS1	8.53133	0.0290354
PRMT1	8.65189	4.64e-11
FURIN	-1.29729	3.83e-12
PRSS27	-1.3068	0.0376963
HAUS7	1.99906	4.36e-07
RPS6KA5	-2.43274	6.93e-12
CLCF1	-3.73037	0.000921695
PDCD10	-2.37245	1.3e-11
ANKS6	2.79261	1.16e-12
GGT5	5.12879	0.0286382
ADCY7	4.53309	0.000421477
SYNC	-3.69857	3.19e-38
CFLAR	3.45148	0.0494726
TOR1AIP2	-1.46888	0.00459797
DRAP1	2.04108	1.69e-17
SPINT2	6.21891	0.000679608
VCL	-1.20374	3.85e-15
ZMPSTE24	-1.31808	2.52e-14
NME4	2.90943	2.85e-11
	2.05385	1.97e-21
FSD1L	-2.57405	0.0440679
ENTREP2	8.08358	8.35e-09
CDK11A	2.53614	1.31e-19
BDH1	-3.29488	0.0355224
HSP90B1	9.67605	5.21e-14
TPP1	-1.23937	0.012295
STEAP4	-6.38343	0.000462344
SMOC1	-5.36857	4.74e-252
PPP1R13B	7.35066	1.98e-05
CFAP298	-3.75121	2.16e-22
PCDHGB1	7.00743	7.54e-05
GBP1	-4.37989	5.91e-05
IVD	-2.80948	4.32e-05
NTRK3	7.80942	3.56e-08
NSMCE4A	5.80722	0.00339059
DCLK1	-4.73727	0.000827931
APOL1	-2.96016	2.37e-43
ZCCHC14	-1.27732	1.48e-12
SORBS3	1.63852	3.44e-06
PYCR3	3.53482	4.93e-23
ARHGAP26	1.16387	0.023898
SNX5	3.21331	4.62e-47
METTL25B	-1.0103	0.0148247
ACADM	-2.43838	0.00223216
DIPK2A	-2.22854	6.93e-07
WIZ	1.15804	1.8e-05
TRMT2B	1.16528	0.00160597
	1.82572	0.000738701
	2.73786	3.46e-14
BSG	-1.01556	5.16e-39
FXR1	5.61475	0.0199245
ETS2	-2.06674	3.61e-05
GPR137C	-4.49261	4.44e-05
ZSCAN18	7.37422	8.26e-07
MYEOV	7.5462	1.52e-10
PRR5	4.46297	1.22e-10
RASSF8	-3.99145	0.00697289
GABRE	-1.06378	0.00410406
ZNF671	6.00337	0.00186517
NHLRC1	8.72042	2.44e-11
RNF182	-11.485	7.82e-21
HDAC5	-1.6406	7.15e-09
ERCC6L2	-1.20062	0.0100673
FAM120B	3.17287	0.0476444
INAVA	5.40797	0.00150262
UBE2D3	-1.19619	1.81e-06
EGR1	-1.76466	0.000209758
GREB1L	-3.51508	0.0017564
R3HDM2	1.32621	1.47e-05
CENPX	-1.99463	1.25e-12
SLIT2	-8.50939	1.48e-10
TM4SF5	5.3292	0.0162792
NDUFAB1	-5.41715	1.89e-08
TRIM2	-7.80174	9.77e-08
NSD2	2.281	4.78e-10
R3HDML	5.70505	0.00533325
OAT	7.28981	2.17e-06
MSI2	-7.39	7.72e-06
PPT2	-3.04716	0.004487
PQBP1	-1.32063	0.0172414
PXN	1.15632	0.0152681
TCF7L2	-6.43333	0.027512
RMND1	7.43558	3.64e-06
ALDH4A1	4.0311	3.14e-90
MADD	-7.77584	1.2e-09
CLASP1	-1.21503	0.000170695
CPNE4	5.85893	0.00491485
MTUS1	2.53448	4.62e-77
RPE	1.34419	0.0363568
ACSM3	3.70423	4.28e-19
TNIK	-2.75107	1.42e-13
STOM	-2.3196	2.67e-85
SLC2A12	1.97194	0.000718363
BEND7	7.70706	2.04e-07
QSOX2	-1.42253	2.1e-28
IKBKG	-2.25257	2.95e-07
WDR44	-1.12984	8.94e-14
ACACA	-8.34282	1.48e-08
CMPK1	-1.3241	1.77e-09
IRF9	-8.11327	0.00104997
CYRIB	10.7514	7.45e-19
GJB3	-3.48285	0.00915533
GJB3	-5.28038	1.15e-59
	1.43121	0.00954778
HMGCS1	-2.24679	7.94e-16
TNIP1	-12.5247	5.46e-26
RTL5	4.16232	7.42e-31
UPP1	1.41199	4.35e-15
SMARCA4	-6.10904	2.99e-06
KCNV1	7.28583	3.53e-06
PASK	1.60017	1.31e-07
OLFM1	-2.42084	7.72e-53
RHOQ	-4.29726	0.0255507
SPECC1	5.01008	0.0405354
RAB29	-2.03392	1.66e-05
CYRIB	1.93055	0.0437014
STK36	-1.41276	1.98e-05
PRNP	-5.85568	0.0158914
PRNP	-1.11325	0.00291758
PHLDB1	-1.09087	4.02e-06
RAB30	-1.55063	0.000863993
CTSB	-8.30992	1.82e-08
FBXL12	-1.56123	0.00263689
NQO2	-1.71488	9.1e-68
ARMC5	-3.85796	3.61e-05
SLC35G2	-1.96493	2.12e-06
SULF2	-3.8588	0.0165194
PABPC1	6.14246	0.0395798
CCDC169	-7.49352	4.42e-07
CLOCK	-5.34314	0.0211874
CHRNB4	3.60793	0.00536344
CIMAP3	5.00632	0.0355279
OVGP1	-1.51625	0.0265381
MPST	2.64405	0.000414426
[truncated: 13,527 more rows]
