# Supplementary material for: TET1 Suppresses Hepatocellular Carcinoma Progression by Modulating the PI3K/Akt Signaling Pathways
Source: Research Square preprint supplement (doi:10.21203/rs.3.rs-8307416/v1), 2025-12-30
Supplement: Supplementary file 4 [file cell siRNA mRNA.xlsx]

## Sheet: Huh-7
	HuH-7		△Ct		△△Ct		2^-△△Ct
Gene	NC	siTETT1	NC	siTETT1	NC	siTETT1	NC	siTETT1
TET1	26.84	28.11	9.31	11.63	0.15	2.47	0.90125	0.180491
	25.6	27.89	8.77	11.57	-0.39	2.41	1.31039	0.188156
	26.95	28.1	9.42	11.59	0.26	2.43	0.835088	0.185565
GAPDH	17.53	16.48
	16.83	16.32
	16.62	16.51

## Sheet: HepG2
	HepG2			△Ct				△△Ct				2^-△△Ct
Gene	NC	siTETT1		Gene	NC	siTETT1		Gene	NC	siTETT1		NC	siTETT1
TET1	21.94	24.3		TET1	7.17	8.37		TET1	0.02	1.22		0.986233	0.429283
	21.83	24.18			7.08	9.03			-0.07	1.88		1.04972	0.271684
	21.97	24.3			7.19	9.3			0.04	2.15		0.972655	0.225313
GAPDH	14.77	15.93
	14.75	15.15
	14.78	15
