# Supplementary material for: TET1 Suppresses Hepatocellular Carcinoma Progression by Modulating the PI3K/Akt Signaling Pathways
Source: Research Square preprint supplement (doi:10.21203/rs.3.rs-8307416/v1), 2025-12-30
Supplement: Supplementary file 7 [file 统计表格.xlsx]

## Sheet: Sheet1
HepG2
siNC	siTET1
123	28
101	32
99	33
